# Supplementary material for: Up-regulation of miR-155 potentiates CD34+ CML stem/progenitor cells to escape from the growth-inhibitory effects of TGF-ß1 and BMP signaling
Source: EXCLI J. 2021 Apr 15;20:748–63. doi: 10.17179/excli2021-3404 (PMC8073837; doi:10.17179/excli2021-3404)
Supplement: Supplementary information [file EXCLI-20-748-s-001.pdf]

**Supplementary information to:**

**Original article:**

**UP-REGULATION OF MIR-155 POTENTIATES CD34<sup>+</sup> CML STEM/PROGENITOR CELLS TO ESCAPE FROM THE GROWTH-INHIBITORY EFFECTS OF TGF-B1 AND BMP SIGNALING**

Touba Mahdloo<sup>1</sup> 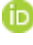, Pantea Sahami<sup>2</sup> 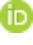, Reihaneh Ramezani<sup>2</sup> 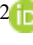, Mojtaba Jafarinia<sup>1</sup> 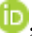,  
Hamedreza Goudarzi<sup>1</sup> 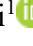, Sadegh Babashah<sup>3,\*</sup> 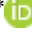

<sup>1</sup> Department of Genetics, Faculty of Basic Sciences, Islamic Azad University, Marvdasht, Iran

<sup>2</sup> Department of Biomedical Sciences, Women Research Center, University of Alzahra, Tehran, Iran

<sup>3</sup> Department of Molecular Genetics, Faculty of Biological Sciences, Tarbiat Modares University, Tehran, Iran

\* **Corresponding author:** Sadegh Babashah, Ph.D., Department of Molecular Genetics, Faculty of Biological Sciences, Tarbiat Modares University, P.O. Box: 14115-154, Tehran, Iran, Tel.: +98 21 8288 4468, fax: +98 21 8288 4717, E-mail: [sadegh.babashah@gmail.com](mailto:sadegh.babashah@gmail.com); [babashah@modares.ac.ir](mailto:babashah@modares.ac.ir)

<http://dx.doi.org/10.17179/excli2021-3404>

This is an Open Access article distributed under the terms of the Creative Commons Attribution License (<http://creativecommons.org/licenses/by/4.0/>).

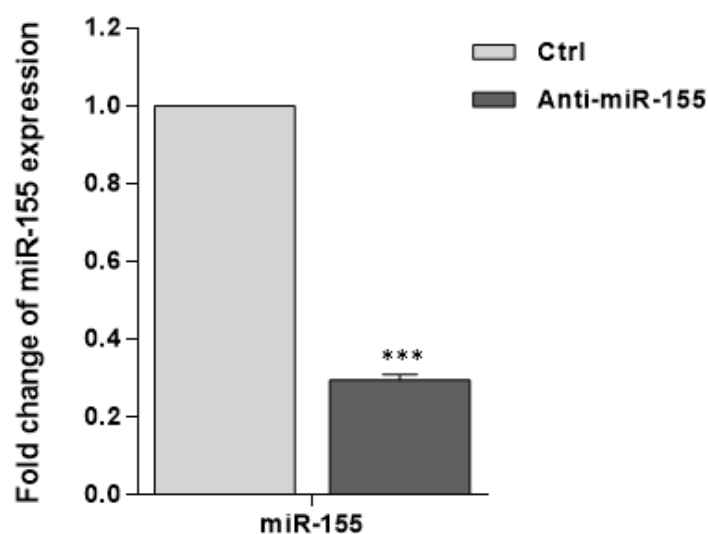

**Supplementary Figure 1:** Fold change of miR-155 in CD34<sup>+</sup> CML cells following transfection with anti-miR-155. miRNA level was measured by qRT-PCR and normalized to U6 snRNA as internal control.
